# Supplementary material for: Antibacterial Activities of Bacteria Isolated from the Marine Sponges Isodictya compressa and Higginsia bidentifera Collected from Algoa Bay, South Africa
Source: PubMed Central journal article supplement (PMC5334627; doi:10.3390/md15020047), 2017-02-17
Supplement: marinedrugs-15-00047-s001.pdf [file marinedrugs-15-00047-s001.pdf]

# Antibacterial Activities of Bacteria Isolated from the Marine Sponges *Isodictya compressa* and *Higginsia bidentifera* Collected from Algoa Bay, South Africa

Relebohile Matthew Matobole <sup>1</sup>, Leonardo Joaquim van Zyl <sup>1,\*</sup>, Shirley Parker-Nance <sup>3,4</sup>, Michael T. Davies-Coleman <sup>2</sup> and Marla Trindade <sup>1</sup>

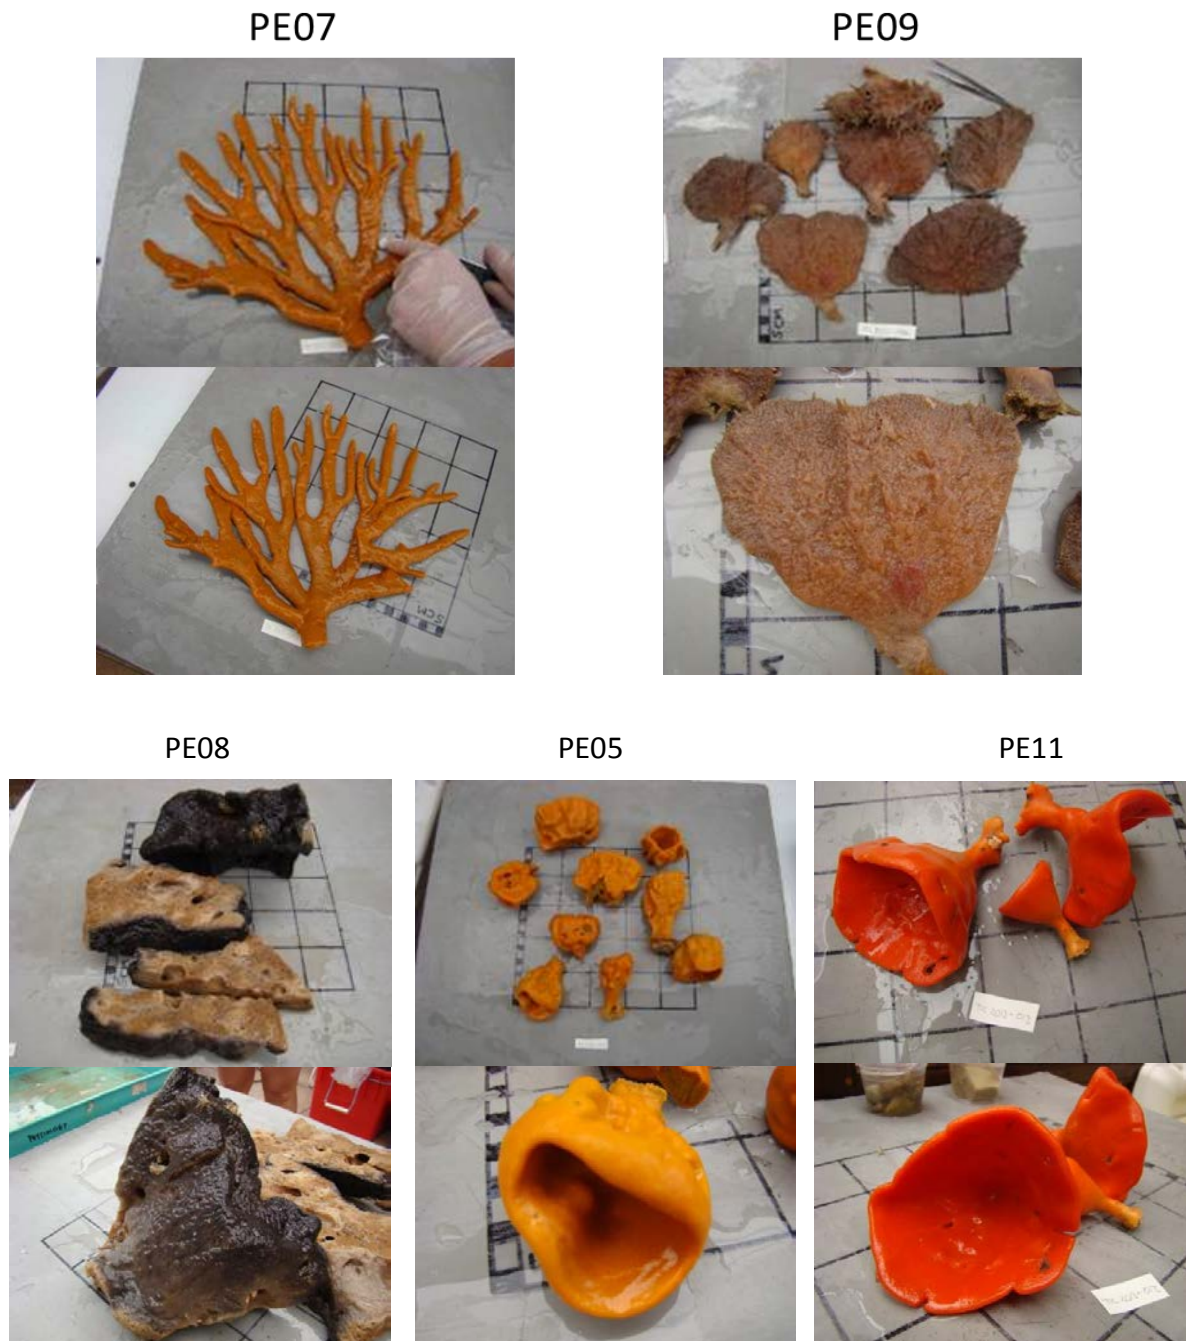

**Figure S1.** Sponges used in this study: PE05 - *Waltherarndtia caliculatum*, PE07 - *Higginsia bidentifera*, PE08 - *Spongia* sp., PE09 - *Isodictya compressa*, PE11 - *Axinella* sp.

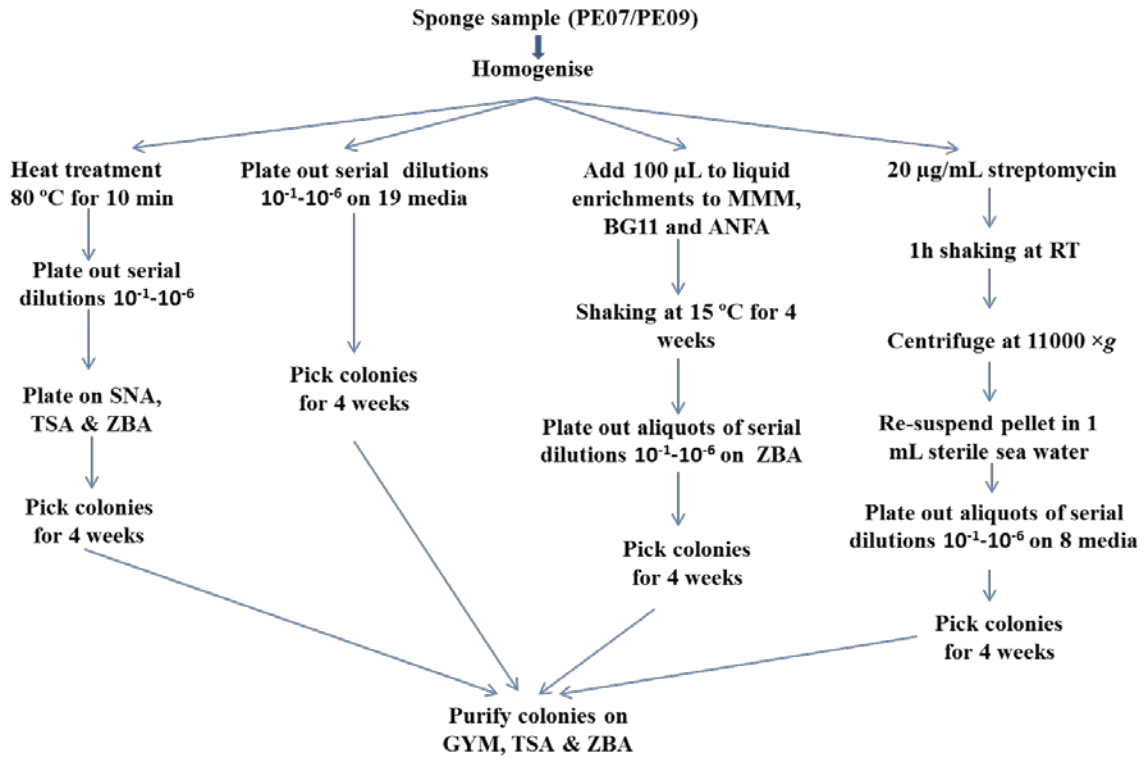

Figure S2. Flow diagram showing the culturing process used in this study.

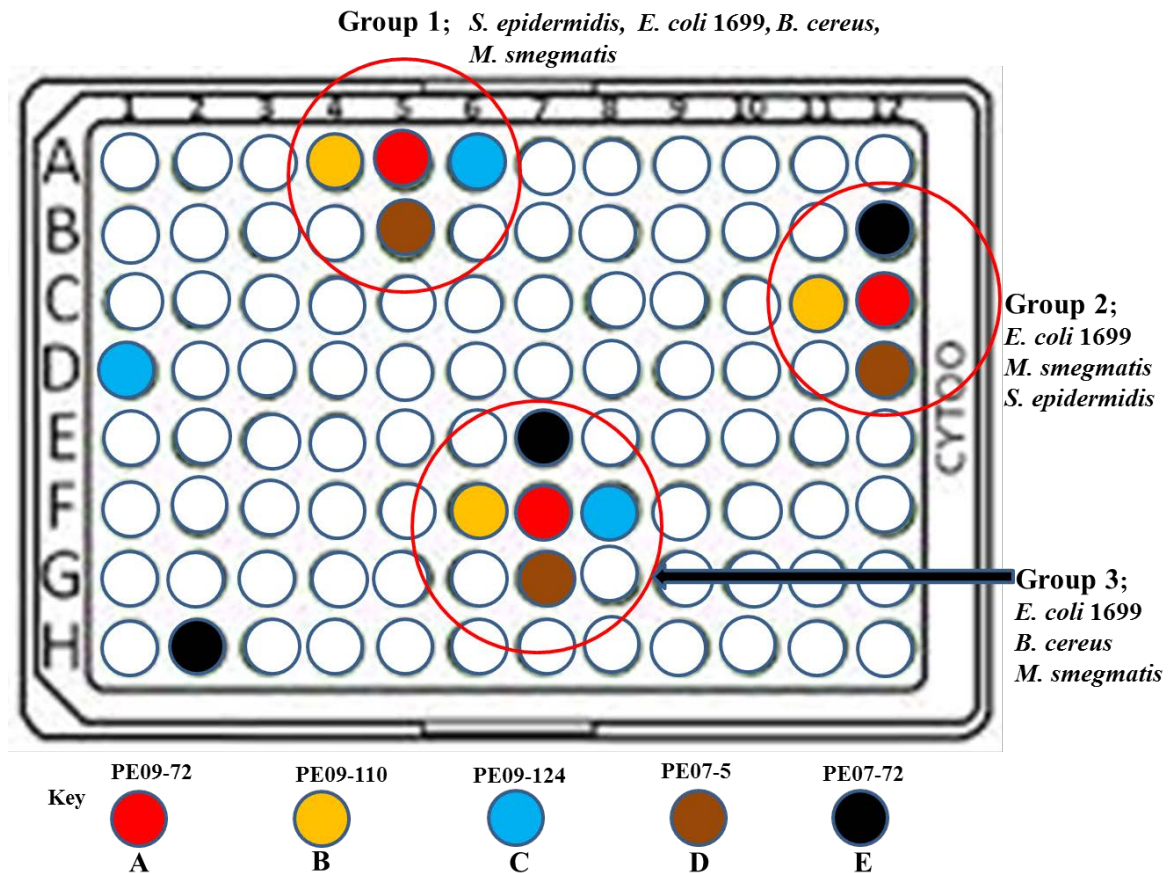

**Figure S3.** 96-well plate setup for matrix screening. Bioactivities of the isolate PE9-72 when cultured on (NaNO<sub>3</sub>, 0.5 mM phosphate, mannitol and heat shock) under co-culture conditions with 3 and 4 “immediate” neighbouring isolates in 96 well-plate setup.

**Table S2.** Panel of 29 isolates selected for the matrix study; 12 isolates which showed antibacterial activities after primary screening and 17 isolates which did not show any bioactivities

| Isolate                              | Identity (%) | Closest hit/relative (as present in EzTaxon)       | Phylum/class        |
|--------------------------------------|--------------|----------------------------------------------------|---------------------|
| <b>Activities in prior screening</b> |              |                                                    |                     |
| PE07-5                               | 99.7         | <i>Bacillus vietnamesis</i> B-23890                | Firmicutes          |
| PE07-106                             | 99.5         | <i>Oceanobacillus picturae</i> LMG 19492           | Firmicutes          |
| PE07-133                             | 99.7         | <i>Micrococcus yunnanensis</i> YIM 65004           | Actinobacteria      |
| PE07-144                             | 99.7         | <i>Bacillus vietnamensis</i> B-23890               | Firmicutes          |
| PE07-172                             | 98.8         | <i>Sporosarcina aquimarina</i> SW28                | Firmicutes          |
| PE07-200                             | 99%          | <i>Staphylococcus warneri</i> ATCC 27836           | Firmicutes          |
| PE09-110                             | 99.8         | <i>Citricoccus nitrophenolicus</i> PNP1            | Actinobacteria      |
| PE09-124                             | 98.9         | <i>Kushneria pakistanensis</i> NCCP-934            | Gammaproteobacteria |
| PE09-140                             | 100          | <i>Pseudomonas fulva</i> NBRC 16637                | Gammaproteobacteria |
| PE09-142                             | NA           | NA                                                 |                     |
| PE09-221                             | 96.5         | <i>Aeromicrobium erythreum</i> NRRL B-3381         | Actinobacteria      |
| PE09-229                             | 99.9         | <i>Halomonas titanicae</i>                         | Gammaproteobacteria |
| <b>No prior activities</b>           |              |                                                    |                     |
| PE07-37                              | 99.5         | <i>Bacillus hwajinpoensis</i> SW-72                | Firmicutes          |
| PE07-72                              | 99.9         | <i>Brevibacterium frigoritolerans</i> DSM 8801     | Firmicutes          |
| PE07-103                             | 99.5         | <i>Bacillus kochii</i> WCC 4582                    | Firmicutes          |
| PE07-124                             | 99.8         | <i>Brevibacterium frigoritolerans</i> DSM 8801     | Firmicutes          |
| PE07-136                             | 99.7         | <i>Lysinibacillus fusiformis</i> NBRC 15717        | Firmicutes          |
| PE09-4                               | 99.9         | <i>Staphylococcus saprophyticus</i> ATCC 15305     | Firmicutes          |
| PE09-55                              | 100          | <i>Pseudovibrio ascidiaceicola</i> DSM 16392       | Alphaproteobacteria |
| PE09-72                              | 99.9         | <i>Bacillus zhangzhouensis</i> DW5-4               | Firmicutes          |
| PE09-77                              | NA           | NA                                                 |                     |
| PE09-103                             | 100          | <i>Pseudovibrio ascidiaceicola</i> DSM 16392       | Alphaproteobacteria |
| PE09-116                             | NA           | NA                                                 |                     |
| PE09-163                             | 99.9         | <i>Staphylococcus saprophyticus</i> ATCC 15305     | Firmicutes          |
| PE09-180                             | 98.7         | <i>Marinilactibacillus piezotolerans</i> DSM 16108 | Firmicutes          |
| PE09-222                             | 100          | <i>Pseudovibrio ascidiaceicola</i> DSM 1692        | Alphaproteobacteria |
| PE09-250                             | 99.9         | <i>Paenibacillus glucanolyticus</i> DSM 5162       | Firmicutes          |
| PE09-267                             | NA           | NA                                                 |                     |
| PE09-274                             | 99.8         | <i>Staphylococcus saprophyticus</i> ATCC 15305     | Firmicutes          |
